# Supplementary material for: Effect of a Multi-Ingredient Coriolus-versicolor-Based Vaginal Gel in Women with HPV–Dependent Cervical Lesions: The Papilobs Real-Life Prospective Study
Source: MDPI journal article supplement (doi:10.3390/cancers15153863), 2023-07-29
Supplement: s1 [file s1]

**Table S1.** List of the different centres that took part in the study and the location

| <b>Centre</b>                                        | <b>Location</b>                     |
|------------------------------------------------------|-------------------------------------|
| CLÍNICA ISIDRO LAGO                                  | Pontevedra                          |
| HOSPITAL QUIRÓN A CORUÑA                             | A Coruña                            |
| CENTRO GINECOLÓGICO DE LEÓN                          | León                                |
| CLÍNICA EUSKALDUNA                                   | Bilbao                              |
| CLÍNICA VIAMED-ALXEN                                 | Logroño                             |
| INSTITUTO FONTSASTRE                                 | Mataró (Barcelona)                  |
| HOSPITAL GENERAL DE CATALUNYA                        | St Cugat del Vallés (Barcelona)     |
| BUFETMEDIC HOSPITALET                                | Hospitalet de Llobregat (Barcelona) |
| CLÍNICA VEGA MEDIA                                   | Molina de Segura (Murcia)           |
| CLÍNICA PRIVADA DR. OLALLA                           | Málaga                              |
| CLÍNICA GINEMED                                      | Sevilla                             |
| CLÍNICA PRIVADA DR. RODRÍGUEZ MARTÍN                 | Algeciras (Cádiz)                   |
| INSITUTO PALACIOS DE SALUD DE LA MUJER               | Madrid                              |
| HOSPITAL SANITAS LA ZARZUELA                         | Madrid                              |
| MD ANDERSON                                          | Madrid                              |
| HM GABINETE VELÁZQUEZ                                | Madrid                              |
| HOSPITAL QUIRÓN MÁLAGA                               | Málaga                              |
| HOSPITAL MANACOR                                     | Manacor (Balears)                   |
| HOSPITAL UNIVERSITARI I POLITÈCNIC LA FE             | Valencia                            |
| HOSPITAL UNIVERSITARIO VIRGEN DE LAS NIEVES (FIBAO)  | Granada                             |
| HOSPITAL CLÍNICO SAN CARLOS                          | Madrid                              |
| HOSPITAL UNIVERSITARIO INFANTA LEONOR                | Madrid                              |
| HOSPITAL GENERAL UNIVERSITARIO ALICANTE              | Alicante                            |
| HOSPITAL SANTA ÁNGELA DE LA CRUZ                     | Sevilla                             |
| HOSPITAL JUAN RAMÓN JIMÉNEZ                          | Huelva                              |
| GINECOM                                              | Las Palmas de GC                    |
| HOSPITAL NTRA SRA ROSARIO                            | Madrid                              |
| CLÍNICA ALBORÁN CMM                                  | Almería                             |
| BONAL GINECOLOGÍA                                    | Granada                             |
| Dr. Rosa María Fernández Arguelles. Private practice | Langreo (Asturias)                  |
| Dr. Lucía Vior Martínez. Private practice            | Oviedo                              |

|                                                    |                   |
|----------------------------------------------------|-------------------|
| CLÍNICA BUENAVISTA                                 | Oviedo            |
| CENTRO MÉDICO ASTURIAS                             | Oviedo            |
| HOSPITAL UNIVERSITARIO VIRGEN DE VALME             | Sevilla           |
| CENTRO MÉDICO PALENCIA                             | Palencia          |
| AVANTMÈDIC                                         | Lleida            |
| Dr. Perla Hernández Muñoz. Private practice        | Mieres (Asturias) |
| FUNDACIÓN JIMÉNEZ DÍAZ                             | Madrid            |
| CLÍNICA MILLENIUM-DENT                             | Barcelona         |
| HOSPITAL GENERAL UNIVERSITARIO<br>GREGORIO MARAÑÓN | Madrid            |

**Table S2.** Biopsy evolution among the visits

|                    | <b>Visit 2 vs Baseline<br/>(n=26)</b> | <b>Visit 3 vs Baseline<br/>(n=13)</b> | <b>Visit 3 vs Visit 2<br/>(n=11)</b> |
|--------------------|---------------------------------------|---------------------------------------|--------------------------------------|
| <b>Improvement</b> | 4 (15.4)                              | 3 (23.1)                              | 2 (18.2)                             |
| <b>No change</b>   | 20 (77.4)                             | 9 (69.2)                              | 7 (63.6)                             |
| <b>Worsening</b>   | 2 (7.2)                               | 1 (7.7)                               | 2 (18.2)                             |

Percentages values (in brackets) were calculated from patients in which a biopsy was performed in both compared visits.

Visit 2: 6 months; Visit 3: 12 months.
